# Supplementary material
Source: PubMed Central journal article supplement (PMC3222522)
Supplement: mt2011146x1.pdf [file mt2011146x1.pdf]

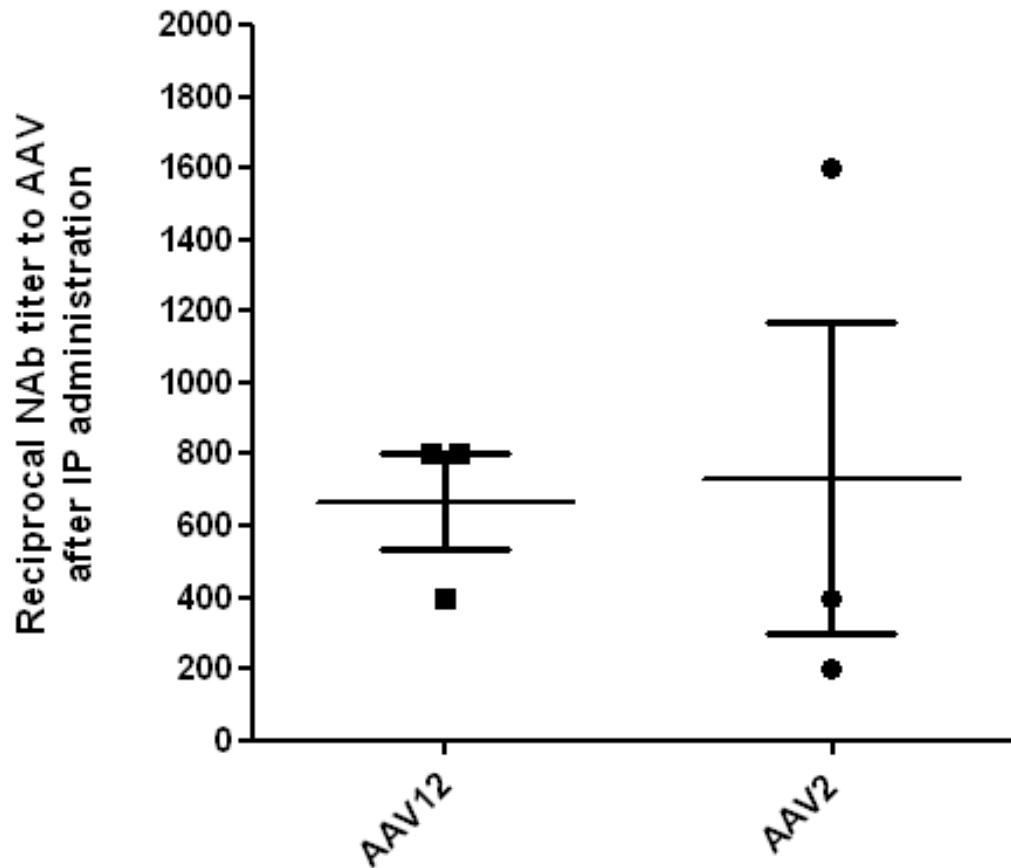

**Supplementary Figure 1:** Detection of serum neutralizing antibodies after IP administration of rAAV-Luc vectors. Mice were administered  $1 \times 10^{11}$  rAAV12-Luc or rAAV2-Luc vector particles by IP route. Serum Nab to AAV12 and AAV2 were measured four weeks post initial vector administration as described in the methods. Neutralizing titers were expressed as the reciprocal of the highest serum dilution that still gave 50% transduction with rAAV-Luc vectors compared to naïve control serum. Error bars represent the mean reciprocal Nab titer to AAV + SEM, where  $n = 3$ . Statistical comparison was performed by unpaired t-test to compare groups.
