# Supplementary material
Source: PubMed Central journal article supplement (PMC3222522)
Supplement: mt2011146x2.pdf [file mt2011146x2.pdf]

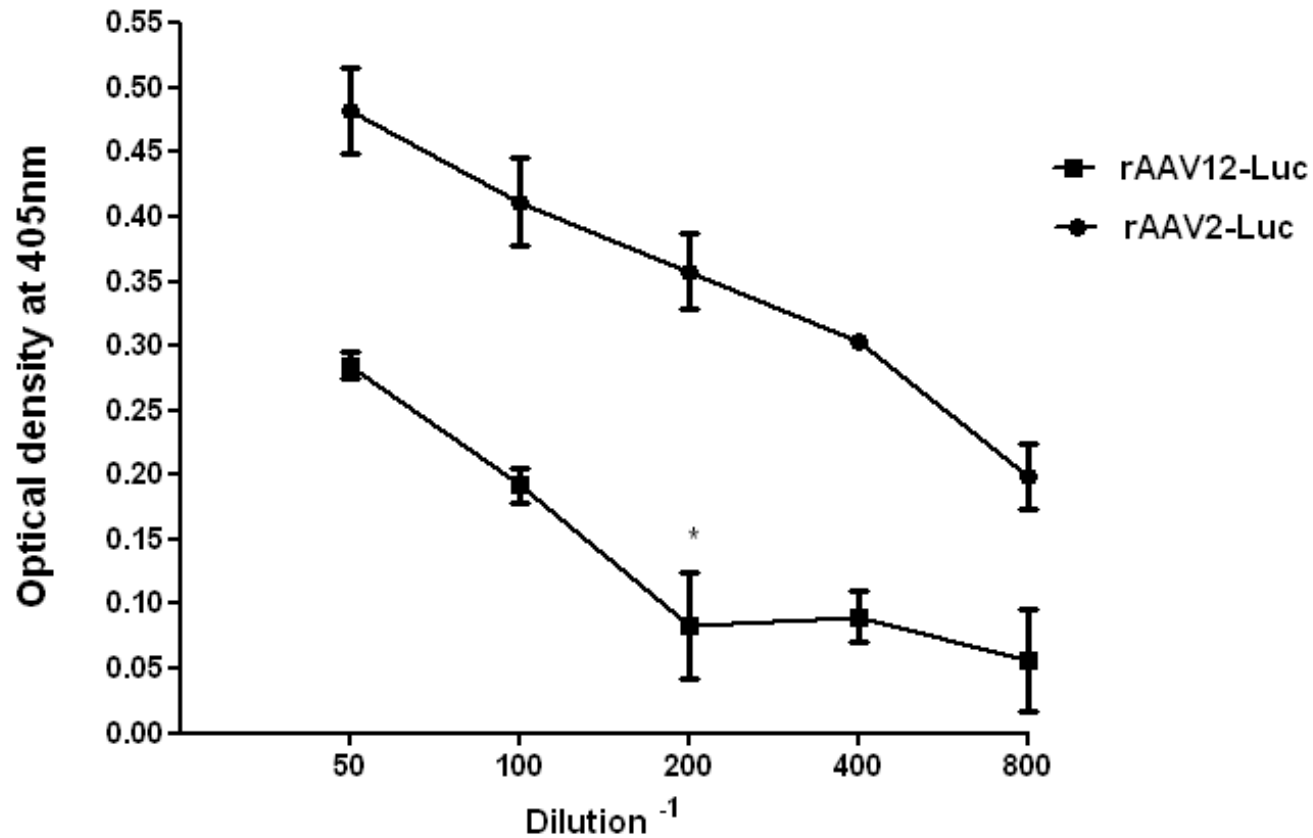

**Supplementary Figure 2:** Detection of anti-AAV capsid IgG antibodies after IP administration of rAAV-Luc vectors. Mice were administered  $1 \times 10^{11}$  rAAV12-Luc or rAAV2-Luc vector particles by IP route. Anti-AAV capsid protein IgG titers were measured four weeks post initial rAAV12-Luc and rAAV2-Luc IP administration by ELISA as described in methods. Optical density values of naïve serum controls were subtracted from overall values. Error bars represent the mean optical density reading + SEM, where  $n = 3$ . Statistical comparison was performed by unpaired t-test to compare titers from rAAV12-Luc animals with those of the rAAV2-Luc group (\* indicates  $P < 0.05$ )
